# Supplementary material for: Epidemiological Characteristics and Risk Factor Analysis of Sports Injuries among Beijing Normal University Students: A Cross-sectional Survey
Source: Research Square preprint supplement (doi:10.21203/rs.3.rs-8681011/v1), 2026-02-17
Supplement: Supplementary file 1 [file 50fac6a5d101ec8ae447b247.docx]

1. The list of Abbreviations

Table S1 Comparison Table of Abbreviations and Full Names in the Main Text

| **Abbreviation** | **English Full Name** | **Chinese Full Name** |
| --- | --- | --- |
| ALAS | Acute Lateral Ankle Sprain | 急性外侧踝关节扭伤 |
| BMI | Body Mass Index | 身体质量指数 |
| CI | Confidence Interval | 置信区间 |
| FAI | Functional Ankle Instability | 功能性踝关节不稳 |
| OR | Odds Ratio | 比值比 |
| SD | Standard Deviation | 标准差 |
| SPSS | Statistical Package for the Social Sciences |  |

2. Questionnaire (English)

**Epidemiological Characteristics and Risk Factor Analysis of Sports Injuries among Beijing Normal University Students**

Hello, thank you for filling out this questionnaire. By filling it out, you are deemed to have consented to the collection of the survey data and its subsequent use in research. The collected information will only be used for this research and subsequent data analysis. Your personal information will be kept strictly confidential and only used for scientific research statistical analysis and thesis writing. This research mainly conducts an epidemiological survey and statistical study by investigating the current situation of sports injuries among college students at the Zhuhai Campus of Beijing Normal University. For the first time, this research explores the causes and current situation of sports injuries among students majoring in teacher education in the Guangdong-Hong Kong-Macao Greater Bay Area, which has an important forward-looking effect on future teacher education and health in the Greater Bay Area. If you have any suggestions for this survey, please contact us via WeChat (mobile phone number): 15034191914. Thank you for your cooperation. Your completion and sharing of this questionnaire are great support for this research. Thank you!

Note：When you point ‘next page’, means that you have agreed to join this research.

Next Page

1. Your name and mobile phone number (Optional)

_________________________________

2. What is your place of origin? [Fill in the blank] *

_________________________________

3. What is your current major (if you are pursuing a second degree, a postgraduate degree or above, please fill in your undergraduate major) *

_________________________________

4. What is your gender? *

○Male ○Female

5. Your age is [fill in the blank]*

_________________________________

6. What grade are you in? [Multiple-choice question] *

○ Freshman (undergraduate) ○ Sophomore (undergraduate) ○ Junior (undergraduate)

○ Senior (undergraduate) ○ Fifth-year undergraduate student○ First-year student of the second degree ○ Second-year student of the second degree○ First-year master's student ○ Second-year master's student ○ Third-year master's student

○ Doctoral student and above○ Others _________________

7. What is your height (in cm)? [Fill in the blank] *

_________________________________

8. What is your weight (in kg)? [Fill in the blank] *

_________________________________

9. Have you ever participated in a school sports team? (If yes, please write down the name) [Multiple-choice question] *

○ Yes _________________ * ○ No

10. How often do you participate in sports activities (including physical education classes) [Single-choice question] *

○ 9 times or more per week ○ 7 - 8 times per week ○ 5 - 6 times per week

○ 3 - 4 times per week ○ 1 - 2 times per week

11. What is the approximate duration of each of your physical activities? [Single-choice question] *

○ 2 hours or more ○ 1.5 - 2 hours ○ 1 - 1.5 hours ○ 0.5 - 1 hour ○ 0.5 hours or less

12. Do you warm up before participating in physical activities? [Single-choice question] *

○ Yes ○ No

13. What recovery measures do you take after each physical activity? [Multiple-choice question] *

□ Static stretching

□ Dynamic stretching

□ Massage

□ Ice compress (cold shower)

□ Meditation

□ Jogging

□ No recovery measures

□ Others _________________

14. During the physical activity cycle (day/week/month/semester), do you control your diet to ensure an appropriate intake of nutrients? (Neither over - nor under - intake) [Single-choice question] *

○ Yes ○ No

15. What is your average bedtime at night? [Single-choice question] *

○ 22:00 or earlier

○ 22:00 - 23:00

○ 23:00 - 24:00

○ 24:00 - 1:00 the next day

○ 1:00 the next day or later

16. Have you ever suffered a sports injury? [Single-choice question] *

○ Yes ○ No (Please skip to question 35)

17. When was your most recent sports injury (Year - Month - Day) [Fill-in-the-blank question] *

_________________________________

18. What was the sport and the occasion where you suffered the sports injury? [Fill-in-the-blank question] *

_________________________________

19. What were the parts of your body that suffered the sports injury? (Please fill in the specific injury name) [Multiple-choice question] *

□ Head injury _________________*

□ Neck bones and muscle groups _________________*

□ Shoulder bones and muscle groups _________________*

□ Back bones and muscle groups _________________*

□ Waist bones and muscle groups _________________*

□ Hip joint bones and buttock muscles _________________*

□ Knee joint and its ligaments _________________*

□ Ankle joint and its ligaments _________________*

□ Upper limb bones and muscles _________________*

□ Lower limb bones and muscles _________________*

□ Hand injury _________________*

□ Foot injury _________________*

□ Internal organ injury _________________*

□ Others _________________*

20. What were the types and degrees of your sports injury? (The parts should be consistent with the options in the previous question. For example: ligament strain, partial tear, tear; degree of muscle strain; degree of fracture; if you don't know or haven't been evaluated by a professional, please fill in unknown) [Multiple-choice question] *

□ Head injury _________________*

□ Neck bones and muscle groups _________________*

□ Shoulder bones and muscle groups _________________*

□ Back bones and muscle groups _________________*

□ Waist bones and muscle groups _________________*

□ Hip joint bones and buttock muscles _________________*

□ Knee joint and its ligaments _________________*

□ Ankle joint and its ligaments _________________*

□ Upper limb bones and muscles _________________*

□ Lower limb bones and muscles _________________*

□ Hand injury _________________*

□ Foot injury _________________*

□ Internal organ injury _________________*

□ Others _________________*

21. After suffering the sports injury, what is your current recovery status? [Single-choice question] *

○ Just got injured, still in the acute phase

○ Passed the acute phase, entered the recovery phase

○ No longer affects daily activities (walking)

○ Athletic ability has basically recovered

○ Athletic ability has fully recovered

○ Others _________________

22. If you think there is something missing in the description of the previous question, please fill in your specific situation in this question [Fill-in-the-blank question]

_________________________________

23. What are the physical activities you participate in most frequently? (If it is a team sport, please fill in your position on the field) [Multiple-choice question] *

□ Football _________________

□ Basketball _________________

□ Volleyball _________________

□ Sprint (400 meters or less)

□ Middle - long distance running (400 meters - 1500 meters)

□ Long - distance running (more than 1500 meters)

□ Swimming (your best - at stroke) _________________*

□ Table tennis

□ Badminton

□ Tennis

□ Golf

□ Dance _________________

□ Bodybuilding

□ Yoga

□ Rugby _________________

□ Crossfit

□ Archery

□ Others _________________

24. How many years have you been participating in this physical activity? (Answer format: n years, where n refers to the time period from the start to the present) [Fill-in-the-blank question] *

_________________________________

25. Your past history of sports injuries (If any, please state the number of times and the parts; if it is the first injury, please fill in none) [Fill-in-the-blank question] *

__________________________

26. The following is a description of the possible physical and mental conditions before and after you suffer a sports injury [matrix multiple-choice questions]*

|  | Very inconsistent | Inconsistent | General | Consistent | Highly consistent |
| --- | --- | --- | --- | --- | --- |
| Try my best to do every sports activity movement to the best. | ○ | ○ | ○ | ○ | ○ |
| Participated in many sports activities during a week before the sports injury. | ○ | ○ | ○ | ○ | ○ |
| The night before the sports injury, I was staying up late. | ○ | ○ | ○ | ○ | ○ |
| My technical movements were unconventional when I had a sports injury. | ○ | ○ | ○ | ○ | ○ |
| The intensity of the physical exercise is relatively high when a sports injury occurs. | ○ | ○ | ○ | ○ | ○ |
| I was not feeling well before the sports injury, but I still participated in sports activities. | ○ | ○ | ○ | ○ | ○ |
| I'm rather restless and irritable when I suffer from sports injuries. | ○ | ○ | ○ | ○ | ○ |
| Before sports injuries, I was eager to achieve excellence. | ○ | ○ | ○ | ○ | ○ |

27. The following are descriptions of your opponent/teammate before and after your sports injury [matrix multiple-choice questions]*

|  | Very inconsistent | Inconsistent | General | Consistent | Highly consistent |
| --- | --- | --- | --- | --- | --- |
| The daily exercise intensity of my teammates is very high. | ○ | ○ | ○ | ○ | ○ |
| My teammates will warm up before sports activities. | ○ | ○ | ○ | ○ | ○ |
| My teammates will relax after physical activities. | ○ | ○ | ○ | ○ | ○ |
| My teammates actively learn knowledge about sports injuries. | ○ | ○ | ○ | ○ | ○ |
| My opponent is actively striving for victory in sports activities. | ○ | ○ | ○ | ○ | ○ |
| My opponents put a lot of physical pressure on me on the field. | ○ | ○ | ○ | ○ | ○ |
| My opponent puts a lot of psychological pressure on me on the field. | ○ | ○ | ○ | ○ | ○ |
| My opponents have a relatively high competitive level in sports activities. | ○ | ○ | ○ | ○ | ○ |

28. The following is a description of the possible impacts on your sports injury [matrix multiple-choice questions] *

|  | Very inconsistent | Inconsistent | General | Consistent | Highly consistent |
| --- | --- | --- | --- | --- | --- |
| This injury has affected my daily activities. | ○ | ○ | ○ | ○ | ○ |
| This injury has affected my maximum strength. | ○ | ○ | ○ | ○ | ○ |
| This injury has affected my subsequent skill learning. | ○ | ○ | ○ | ○ | ○ |
| This injury has affected my explosive power. | ○ | ○ | ○ | ○ | ○ |
| This injury has affected my flexibility. | ○ | ○ | ○ | ○ | ○ |
| This injury has affected my agility. | ○ | ○ | ○ | ○ | ○ |

29. What do you think are the reasons for your sports injury? [Multiple-choice question] *

□ Not doing a good warm-up before exercise

□ Excessive exercise intensity during exercise

□ Participating in the next exercise before the body has recovered in time after exercise

□ Unsuitable weather and temperature

□ Not wearing appropriate clothing, shoes, etc.

□ Not wearing auxiliary equipment, such as knee pads, wrist guards, etc.

□ Lack of sports rehabilitation knowledge

□ Lack of effective recovery methods in practice

□ Muscle strength imbalance

□ Poor flexibility

□ Others

30. Please briefly describe the cause or process of your sports injury. [Fill-in-the-blank question] *

__________________________

31. What are your views on the following behaviors after suffering from sports injuries [matrix multiple-choice question] *

|  | Very inconsistent | Inconsistent | General | Consistent | Highly consistent |
| --- | --- | --- | --- | --- | --- |
| Rehabilitation is necessary. | ○ | ○ | ○ | ○ | ○ |
| Carry out rehabilitation training in a timely manner | ○ | ○ | ○ | ○ | ○ |
| Have surgery in a regular hospital if necessary. | ○ | ○ | ○ | ○ | ○ |
| Rehabilitate under traditional Chinese medicine bone setting and tuina techniques | ○ | ○ | ○ | ○ | ○ |
| Recover with the help of Western medicine | ○ | ○ | ○ | ○ | ○ |
| Recover with the help of traditional Chinese medicine decoction | ○ | ○ | ○ | ○ | ○ |
| Learn relevant knowledge about sports health care | ○ | ○ | ○ | ○ | ○ |
| Carry out rehabilitation under the guidance of professionals | ○ | ○ | ○ | ○ | ○ |
| Self-study for active rehabilitation | ○ | ○ | ○ | ○ | ○ |

32. Did you take the initiative to learn the theory and practical knowledge of rehabilitation before or after suffering a sports injury? [Multiple-choice question] *

○ Started learning rehabilitation knowledge before suffering a sports injury.

○ Started learning rehabilitation knowledge immediately after the injury.

○ Started learning rehabilitation knowledge after the recovery period began.

○ Started learning rehabilitation knowledge after the limitation of self-activity during the rehabilitation.

○ Never started learning rehabilitation knowledge.

33. What do you think is your level of understanding of sports injury knowledge? [Multiple-choice question] *

○ Completely don't understand.

○ Only know one-sided information.

○ Have a good understanding of the sports injury and rehabilitation knowledge of my injured part.

○ Have a good understanding of most of the injury and rehabilitation knowledge.

○ Have received professional training and learning, and understand sports injury and rehabilitation knowledge.

34. If you participate in the theoretical courses related to sports health care, which of the following aspects of knowledge do you want to learn? [Multiple-choice question] *

□ Warm-up activities before exercise.

□ Protective measures during exercise.

□ How to recover quickly after exercise.

□ Daily behavior health care knowledge.

□ Methods to improve my physical fitness.

□ Sports physiology/anatomy knowledge.

□ Sports nutrition knowledge.

□ Others _________________

35. Do you think it is necessary to set aside special time every week for relaxation training? [Multiple-choice question] *

○ Yes. ○ No.

36. If you participate in rehabilitation practice projects or practical courses, what do you hope to gain? [Multiple-choice question] *

□ Learn rehabilitation practice knowledge.

□ Improve my muscle strength imbalance.

□ Accelerate the recovery of sports injuries.

□ Enhance flexibility.

□ Enhance basic strength.

□ Strengthen body stability.

□ Improve certain sports performance _________________

□ Others _________________

37. Do you think the school should offer stretching and relaxation courses as elective courses? *

○ Yes. ○ No.

38. Please put forward your suggestions for this project [Fill in the blank] (Optional)

_________________________________
